# Supplementary material for: Development of polymeric sensing films based on a tridentate bis(phosphinic amide)-phosphine oxide for detecting europium(iii) in water
Source: Royal Society of Chemistry journal article supplement (doi:10.1039/c2dt30257h), 2012-01-01
Supplement: c2dt30257h.pdf [file c2dt30257h.pdf]

## Development of polymeric sensing films based on a new tridentate bis(phosphinic amide)-phosphine oxide for determining Europium(III) in water

F. J. Sainz-Gonzalo,<sup>a</sup> M. Casimiro,<sup>b</sup> C. Popovici,<sup>b</sup> A. Rodríguez-Diéguez,<sup>c</sup> J. F. Fernández-Sánchez,<sup>\*a</sup> I. Fernández,<sup>\*b</sup> F. L. Ortiz,<sup>\*b</sup> A. Fernández-Gutiérrez<sup>a</sup>

<sup>a</sup> Department of Analytical Chemistry, Faculty of Sciences, University of Granada, Av. Fuentenueva s/n, 18071 Granada, Spain. Fax: +34 958243328; E-mail: [ifferman@ugr.es](mailto:ifferman@ugr.es)

<sup>b</sup> Laboratory of Organic Chemistry, University of Almería, Ctra. Sacramento s/n, 04120 Almería, Spain. Fax: +34 950 015481; Tel: +34 950 015648; E-mail: [ifferman@ual.es](mailto:ifferman@ual.es)

<sup>c</sup> Department of Inorganic Chemistry, Faculty of Sciences, University of Granada, Av. Fuentenueva s/n, 18071 Granada, Spain. Fax: +34-958248526.

### Contents:

- Chemical and Reagents
- Figure S1. ESI-TOF mass spectra in the positive ion mode calculated and simulated of **2** and **4**.
- Figure S2. IR (KBr disk) spectra of **2** and **4**.
- Figure S3. <sup>31</sup>P NMR (202.4 MHz) spectrum of **2** in CD<sub>3</sub>CN at RT.
- Figure S4. <sup>13</sup>C and DEPT-135 NMR (75.5 MHz) spectrum of **2** in CD<sub>3</sub>CN at RT.
- Table S1. <sup>1</sup>H isotropic shifts ( $\delta_{\text{iso}}$ ) for complex **2** at 300 MHz in CD<sub>3</sub>CN at 25 °C.
- Table S2. <sup>1</sup>H isotropic shifts ( $\delta_{\text{iso}}$ ) for complex **4** at 300 MHz in CD<sub>3</sub>CN at 25 °C.
- Figure S5. <sup>1</sup>H EXSY NMR spectrum ( $t_m = 500$  ms) of **2** in CD<sub>3</sub>CN at RT.
- Figure S6. <sup>1</sup>H, <sup>13</sup>C gHMQC NMR spectrum of **2** in CD<sub>3</sub>CN at RT.
- Figure S7. <sup>1</sup>H, <sup>13</sup>C gHMBC NMR spectrum of **2** in CD<sub>3</sub>CN at RT.
- Figure S8. <sup>1</sup>H, <sup>13</sup>C gHMQC and gHMBC NMR expansions of the NiPr<sub>2</sub> region for complex **2**.
- Figure S9. X-Ray structures overlay of [Eu(**1**)Cl<sub>3</sub>] (**4**) and [Y(**1**)(NO<sub>3</sub>)<sub>3</sub>] (**5**).
- Figure S10. Response of the complex luminescence intensity versus Ligand:Eu<sup>3+</sup> ratio and Eu<sup>3+</sup>:Ligand ratio.
- Figure S11. TGA spectrum for complex **2** at the heating rate of 10°C/min under N<sub>2</sub> atmosphere.
- Figure S12. Luminescence intensity versus EtOH percentage in solution.
- Figure S13. Influence of NaCl concentration on the luminescence intensity in solution.
- Figure S14. The pH effect on the complex luminescence intensity in solution.
- Figure S15. The plasticizer effect on the luminescence signals of the membrane sensors.
- Figure S16. Luminescence intensities of the membrane sensors versus DOS plasticizer percentage.
- Figure S17. The joint effect of the ligand and ionic additive percentages on the luminescence responses of the membrane sensors.
- Figure S18. The pH effect on the luminescence signals of the europium sensors.
- Figure S19. Effect of the ionic strength on the luminescence signals of the membrane sensors.
- Figure S20. Calibration graph of europium(III) membrane sensors.
- Figure S21. Variation of the luminescence emission in solution versus time.

## Chemical and reagents

Hydrate chloride salts of the lanthanides used were all of the highest purity available and were obtained from ABCR. Bis(2-ethylhexyl) adipate (DOA), 2-nitrophenyloctyl ether (NPOE), potassium tetrakis(4-chlorophenyl) borate (KTPClPB), high molecular weight poly vinyl chloride (PVC) and succinic acid were purchased from Fluka. Bis(2-ethylhexyl) sebacate (DOS) and dioctyl phthalate (DOP) were obtained from Aldrich. Absolute ethanol, anhydrous sodium acetate and potassium hydrogen phthalate were purchased from Panreac. Tetrahydrofurane (THF) was obtained from Lab-Scan. Deuterated chloroform and acetonitrile were purchased from Cambridge Isotope Laboratories, Inc. Sodium chloride was purchased from Riedel-de Haën. Neutral dihydrate sodium citrate was obtained from Merck. D-tryptophan was purchased from Sigma. All chemicals and reagents were of analytical grade except for bis(2-ethylhexyl) sebacate (reagent grade) and were used as received without further purification.

Aqueous solutions were prepared using doubly distilled water obtained from a Milli-Q Plus 185 ultrapure water system (Millipore, Billerica, USA). Stock and working standard solutions of ligand 1 and lanthanide ions were stored in amber glass bottles at 4 °C.

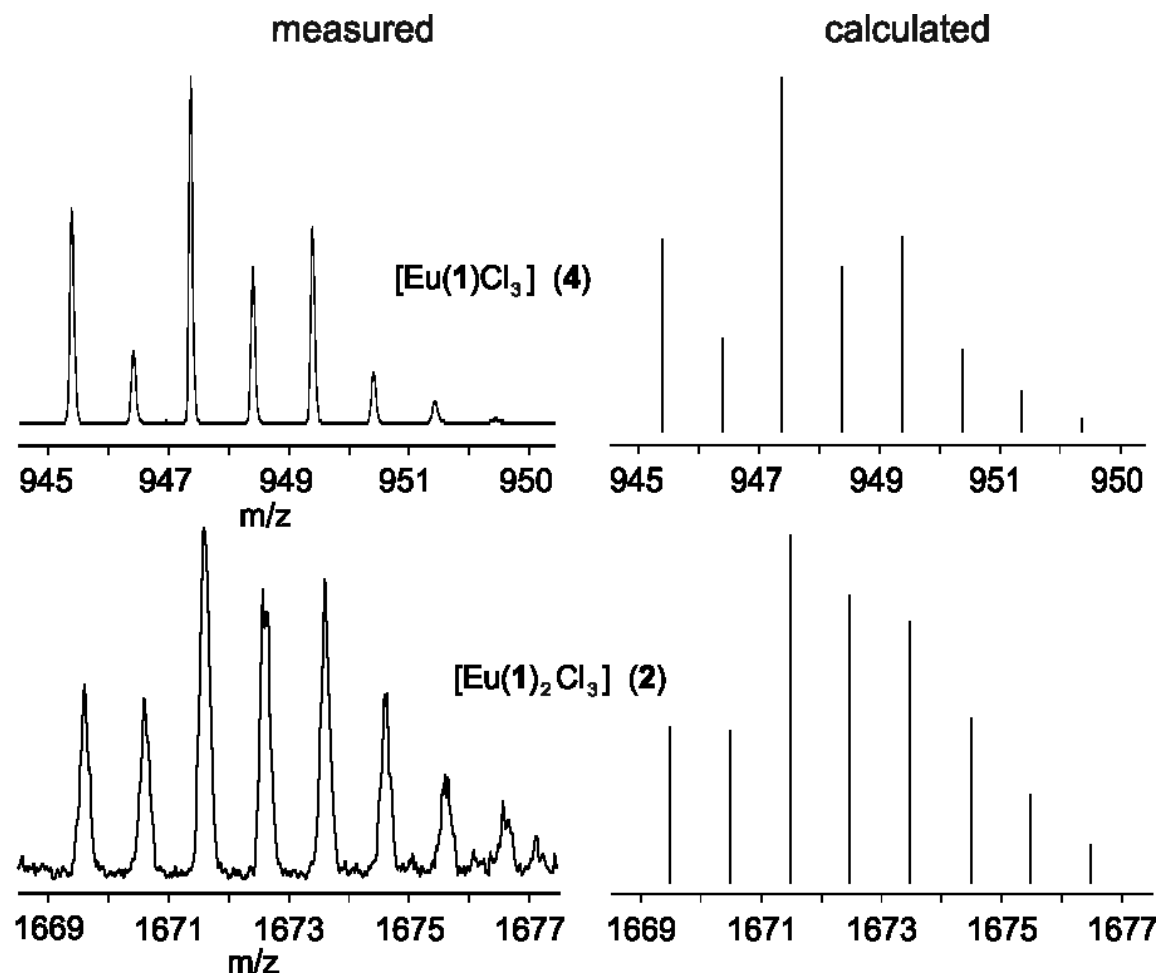

Figure S1. ESI-TOF mass spectra in the positive ion mode calculated and simulated of **2** and **4** in  $\text{CD}_3\text{CN}$ . Note that the optical range for TOF analyzers is below *ca.* 1500 and therefore a significant reduction in the signal/noise is observed.

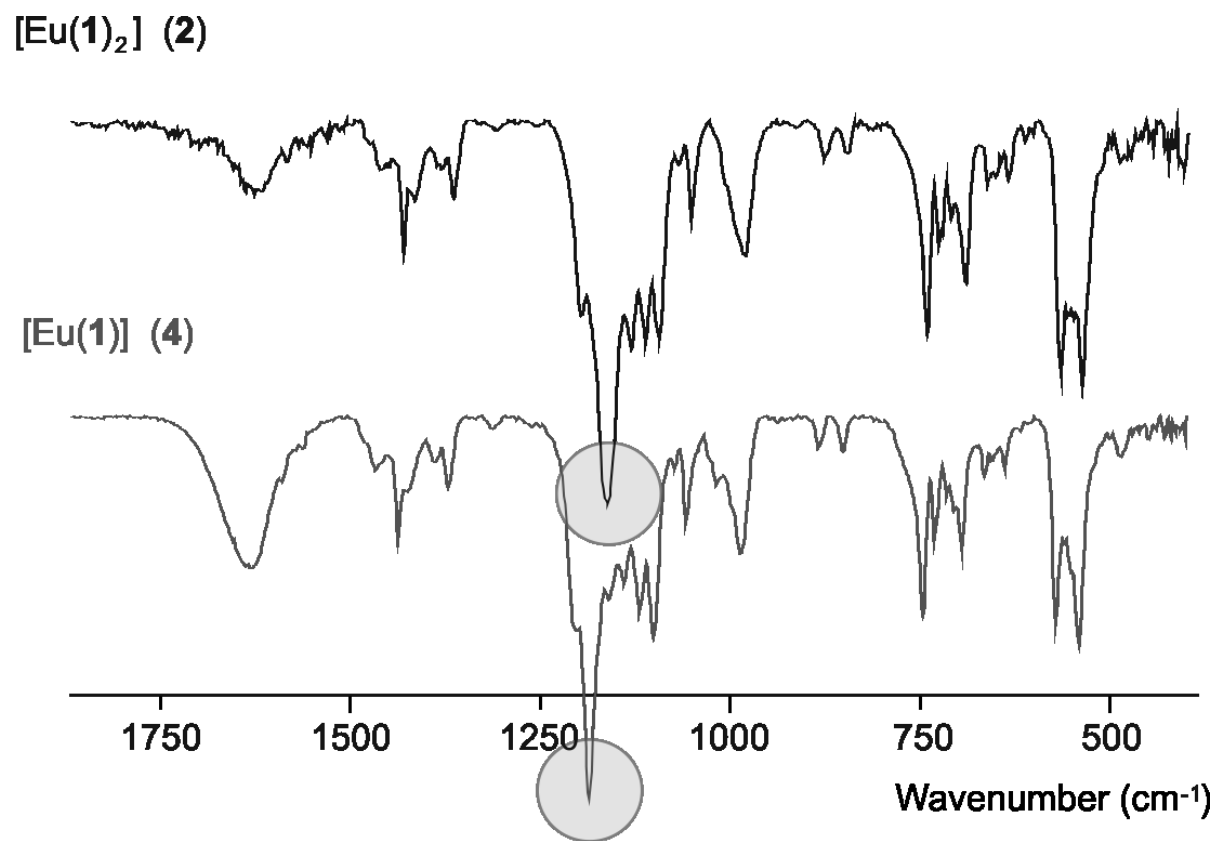

Figure S2. IR (KBr disk) spectra of **2** and **4**.

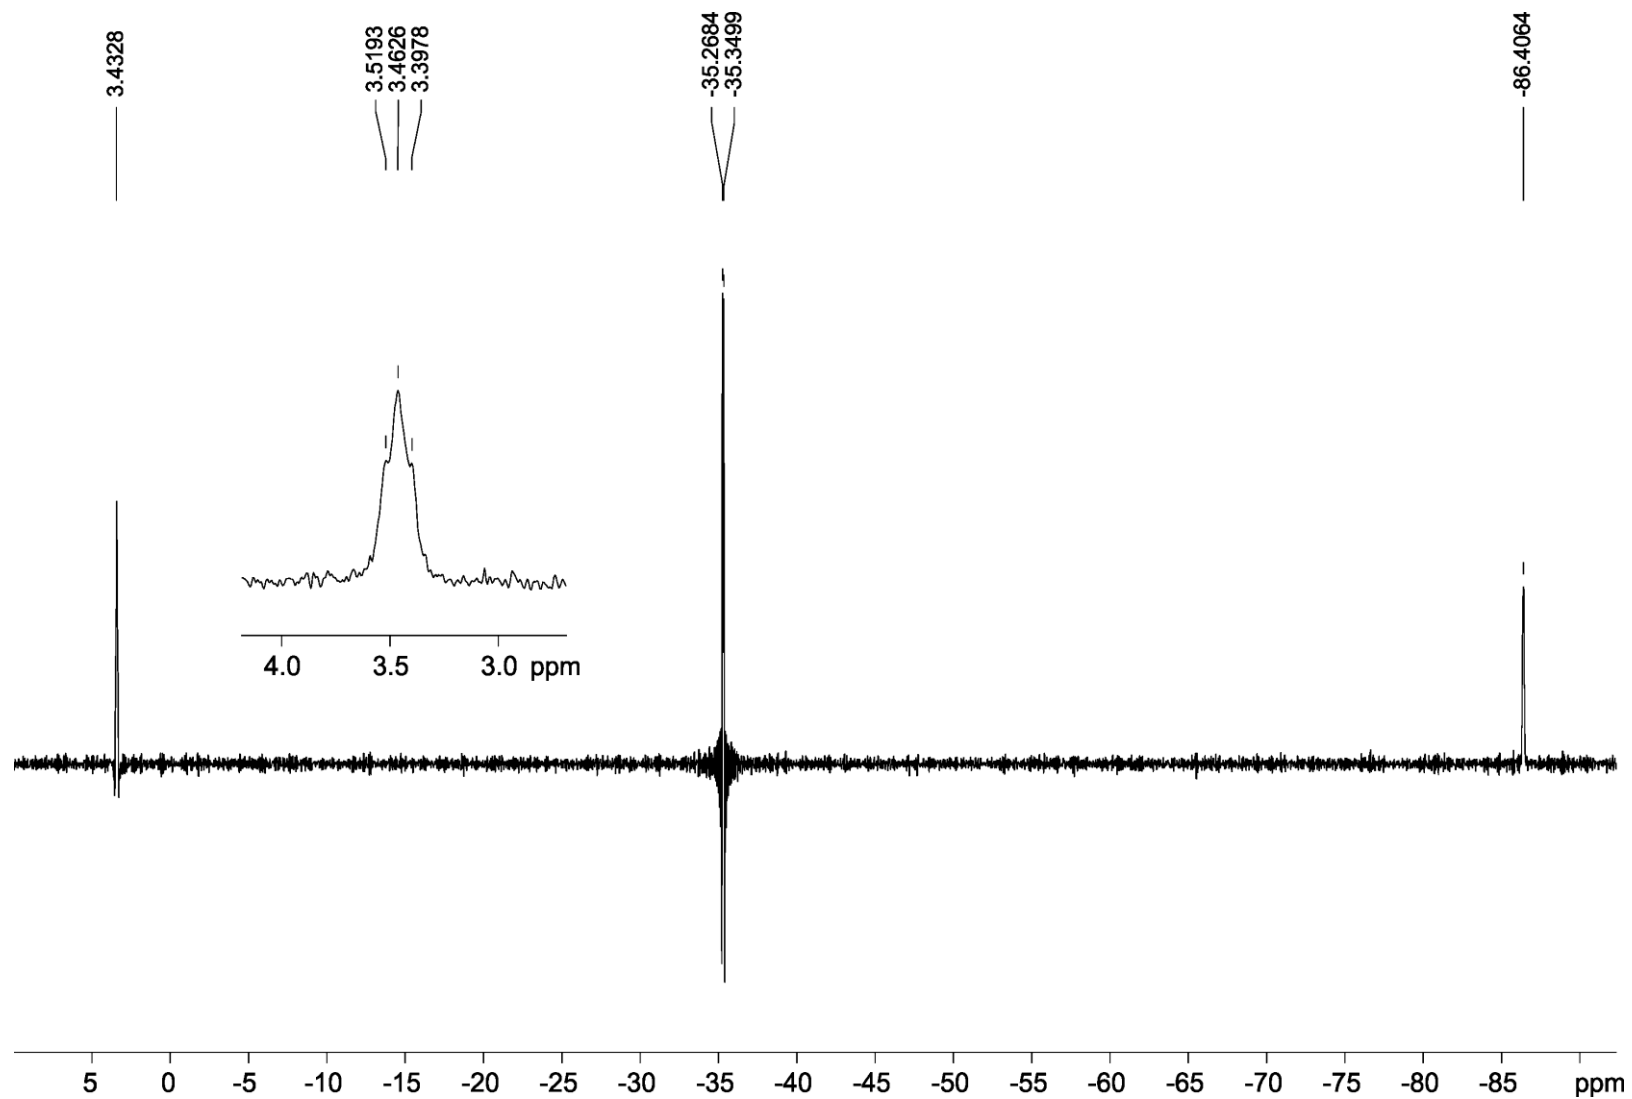

Figure S3.  $^{31}\text{P}$  NMR (202.4 MHz) spectrum of **6** in  $\text{CD}_3\text{CN}$  at RT.

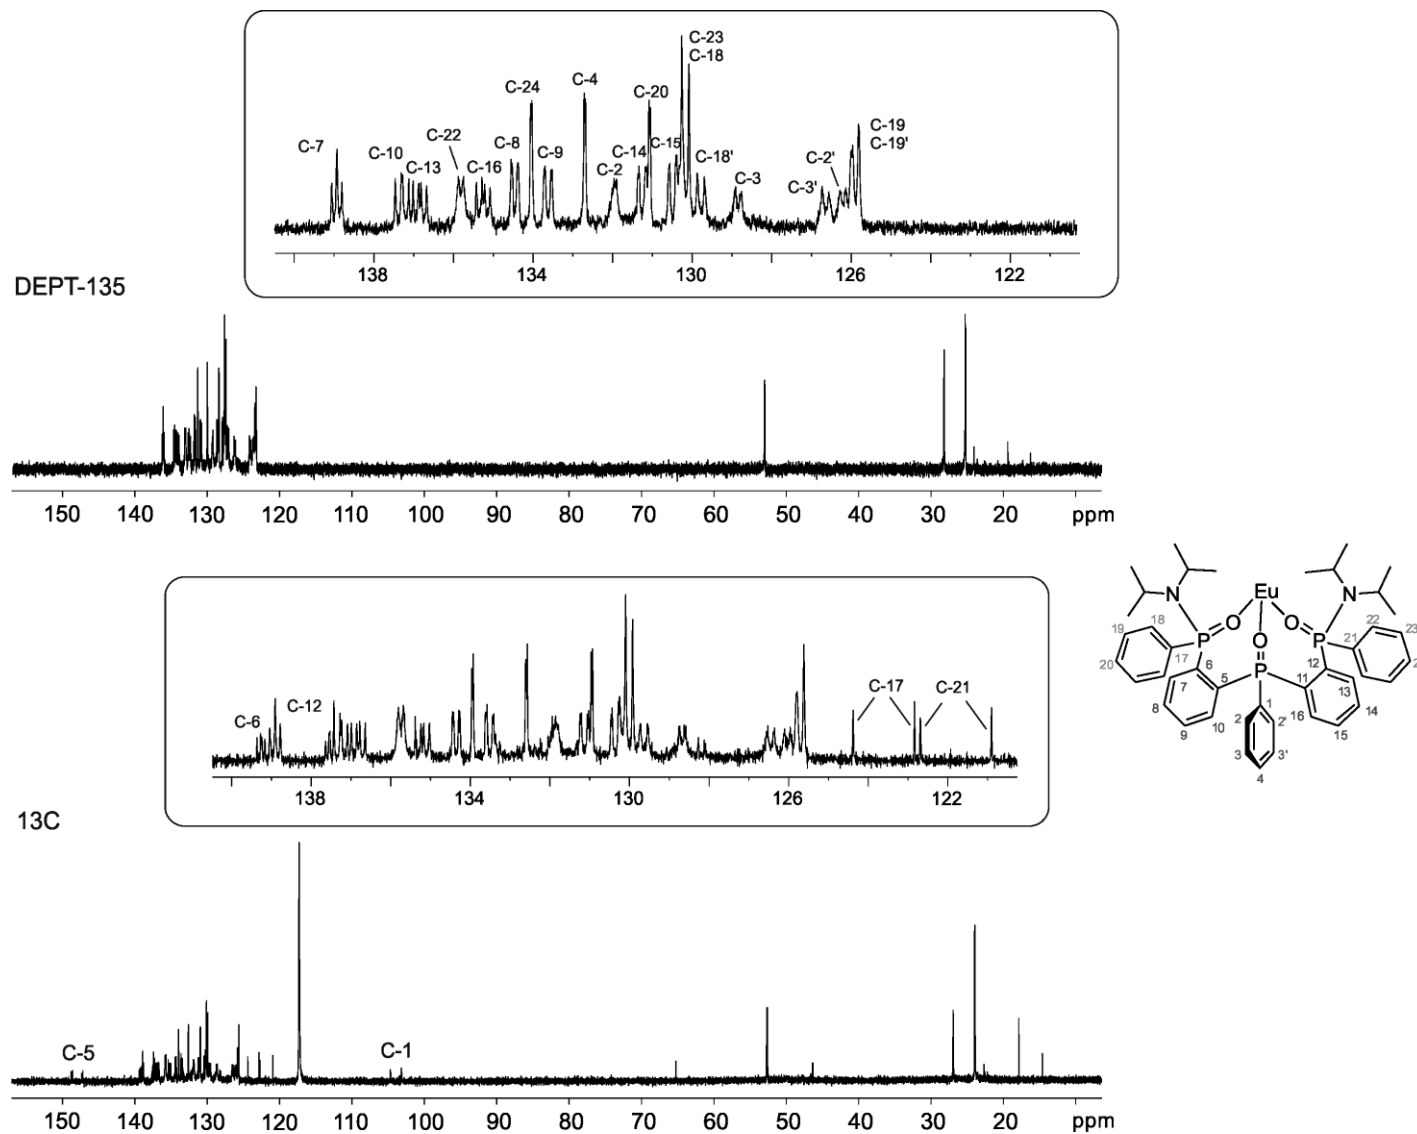

Figure S4.  $^{13}\text{C}$  and DEPT-135 NMR (75.5 MHz) spectrum of **2** in  $\text{CD}_3\text{CN}$  at RT.

Table S1. <sup>1</sup>H isotropic shifts ( $\delta_{\text{iso}}$ ) for complex **2** at 300 MHz in CD<sub>3</sub>CN at 25 °C.

|           |       | [Eu( <b>1</b> ) <sub>2</sub> Cl <sub>3</sub> ] ( <b>2</b> ) | [Y( <b>1</b> ) <sub>2</sub> (NO <sub>3</sub> ) <sub>3</sub> ] ( <b>3</b> ) | $\delta_{\text{iso}}$ |
|-----------|-------|-------------------------------------------------------------|----------------------------------------------------------------------------|-----------------------|
| Ring I    | H-2   | 4.42                                                        | 8.58                                                                       | 4.16                  |
|           | H-2'  | 4.58                                                        | 6.56                                                                       | 2.01                  |
|           | H-3   | 6.28                                                        | 7.90                                                                       | 1.62                  |
|           | H-3'  | 6.79                                                        | 7.48                                                                       | 0.69                  |
|           | H-4   | 7.16                                                        | 7.85                                                                       | 0.69                  |
| Ring II   | H-7   | 9.88                                                        | 8.38                                                                       | -1.50                 |
|           | H-8   | 8.66                                                        | 7.98                                                                       | -0.68                 |
|           | H-9   | 7.93                                                        | 7.65                                                                       | -0.28                 |
|           | H-10  | 6.14                                                        | 7.00                                                                       | 0.86                  |
| Ring III  | H-18  | -0.88                                                       | 8.07                                                                       | 8.95                  |
|           | H-18' | 5.96                                                        | 7.13                                                                       | 1.17                  |
|           | H-19  | 4.85                                                        | 6.90                                                                       | 2.05                  |
|           | H-19' | 5.96                                                        | 7.13                                                                       | 1.17                  |
|           | H-20  | 5.96                                                        | 7.13                                                                       | 1.17                  |
| Ring II'  | H-13  | 6.23                                                        | 6.48                                                                       | 0.25                  |
|           | H-14  | 5.89                                                        | 6.88                                                                       | 0.99                  |
|           | H-15  | 5.45                                                        | 6.98                                                                       | 1.53                  |
|           | H-16  | 3.93                                                        | 7.02                                                                       | 3.09                  |
| Ring III' | H-22  | 8.77                                                        | 8.20                                                                       | -0.57                 |
|           | H-22' | 8.77                                                        | 8.20                                                                       | -0.57                 |
|           | H-23  | 8.22                                                        | 7.79                                                                       | -0.43                 |
|           | H-23' | 8.22                                                        | 7.79                                                                       | -0.43                 |
|           | H-24  | 8.50                                                        | 7.79                                                                       | -0.71                 |

Table S2. <sup>1</sup>H isotropic shifts ( $\delta_{\text{iso}}$ ) for complex **4** at 300 MHz in CD<sub>3</sub>CN at 25 °C.

|           |       | [Eu( <b>1</b> ) <sub>2</sub> Cl <sub>3</sub> ] ( <b>4</b> ) | [Y( <b>1</b> ) <sub>2</sub> (NO <sub>3</sub> ) <sub>3</sub> ] ( <b>5</b> ) | $\delta_{\text{iso}}$ |
|-----------|-------|-------------------------------------------------------------|----------------------------------------------------------------------------|-----------------------|
| Ring I    | H-2   | 4.84                                                        | 7.53                                                                       | 2.69                  |
|           | H-2'  |                                                             |                                                                            |                       |
| Ring II   | H-3   | 6.70                                                        | 7.10                                                                       | 0.4                   |
|           | H-3'  |                                                             |                                                                            |                       |
|           | H-4   |                                                             |                                                                            |                       |
|           | H-7   | 12.34                                                       | 8.56                                                                       | 3.78                  |
| Ring III  | H-8   | 9.24                                                        | 8.04                                                                       | 1.2                   |
|           | H-9   | 8.09                                                        | 7.37                                                                       | 0.72                  |
|           | H-10  | 6.78                                                        | 6.47                                                                       | 0.31                  |
|           | H-18  | 5.67                                                        | 7.80                                                                       | 2.13                  |
| Ring II'  | H-18' |                                                             |                                                                            |                       |
|           | H-19  | 5.17                                                        | 7.23                                                                       | 2.06                  |
|           | H-19' |                                                             |                                                                            |                       |
|           | H-20  |                                                             | 7.80                                                                       |                       |
| Ring III' | H-13  | 6.03                                                        | 6.34                                                                       | 0.31                  |
|           | H-14  | 7.06                                                        | 6.34                                                                       | 0.72                  |
|           | H-15  | 7.41                                                        | 6.70                                                                       | 0.71                  |
|           | H-16  | 7.94                                                        | 7.07                                                                       | 0.87                  |
| Ring III' | H-22  | 8.95                                                        | 8.32                                                                       | 0.63                  |
|           | H-22' |                                                             |                                                                            |                       |
|           | H-23  | 8.02                                                        | 7.80                                                                       | 0.22                  |
|           | H-23' |                                                             |                                                                            |                       |
|           | H-24  | 3.43                                                        |                                                                            |                       |



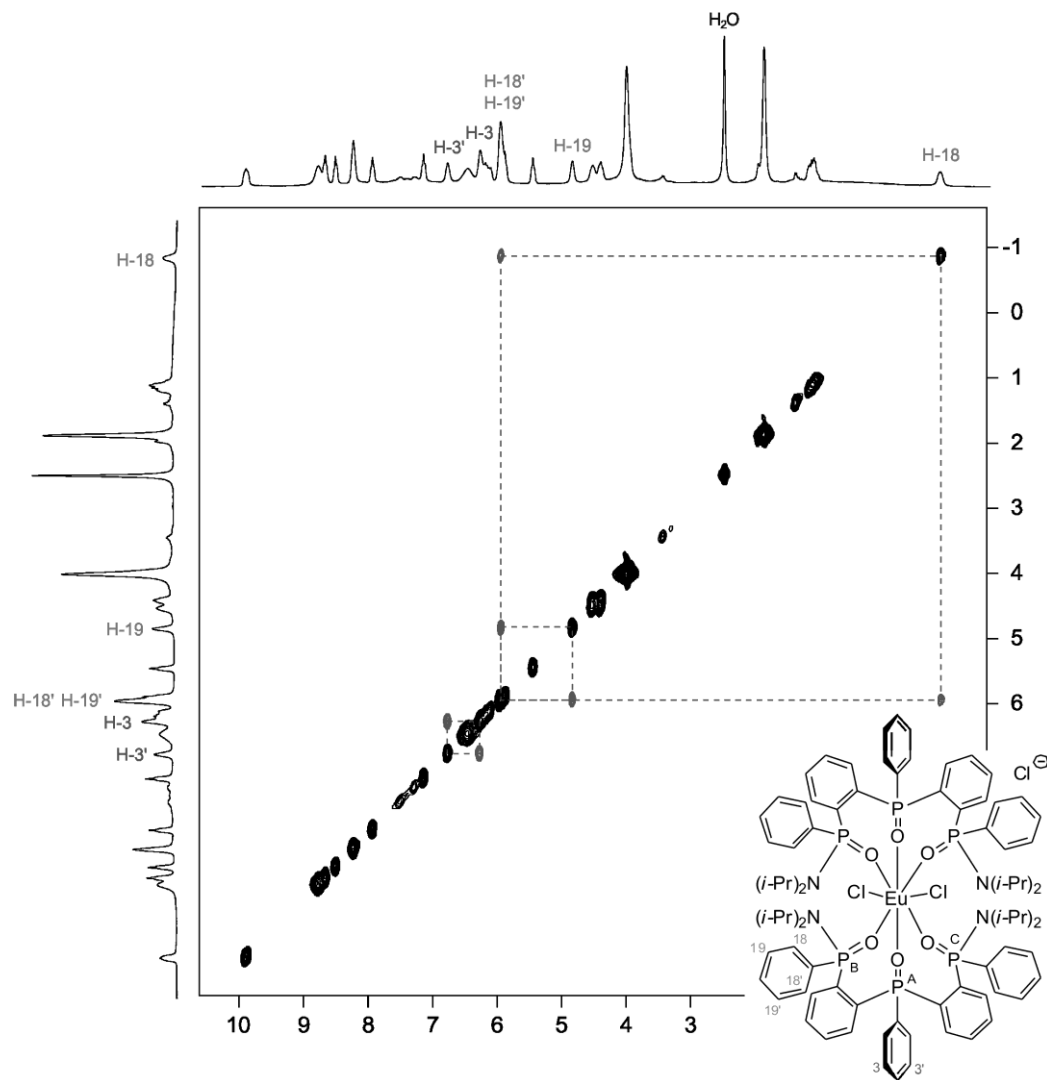

Figure S5.  $^1\text{H}$  EXSY NMR spectrum ( $t_m = 500$  ms) of **2** in  $\text{CD}_3\text{CN}$  at RT.

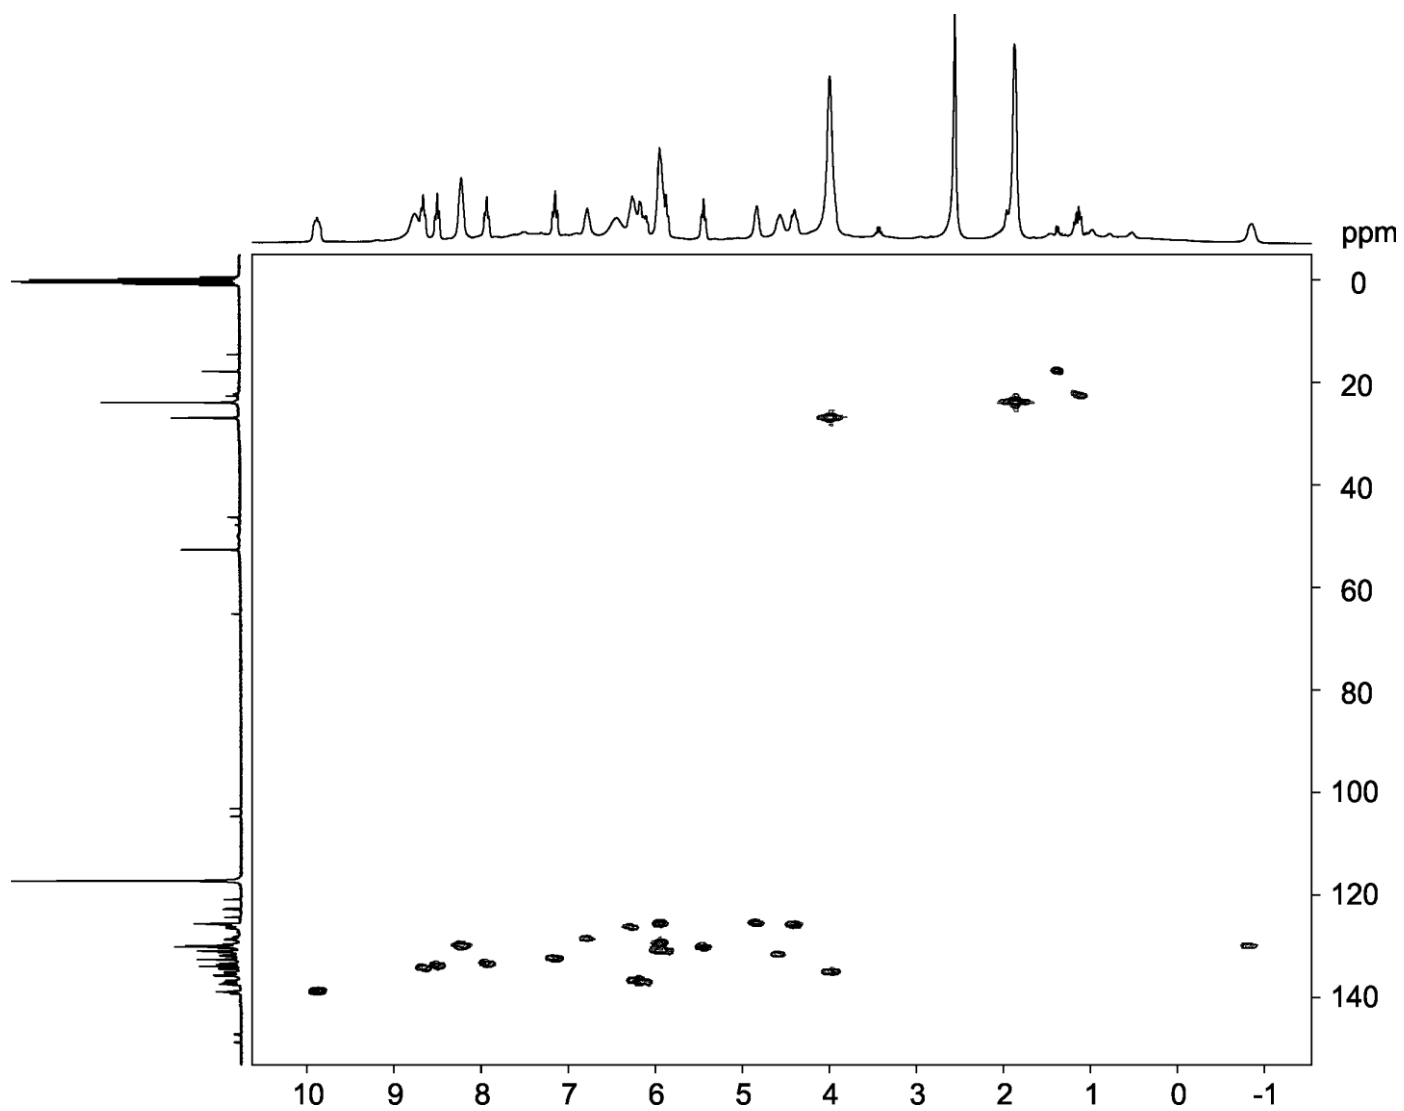

Figure S6.  $^1\text{H}$ ,  $^{13}\text{C}$  gHMQC NMR spectrum of **2** in  $\text{CD}_3\text{CN}$  at RT.

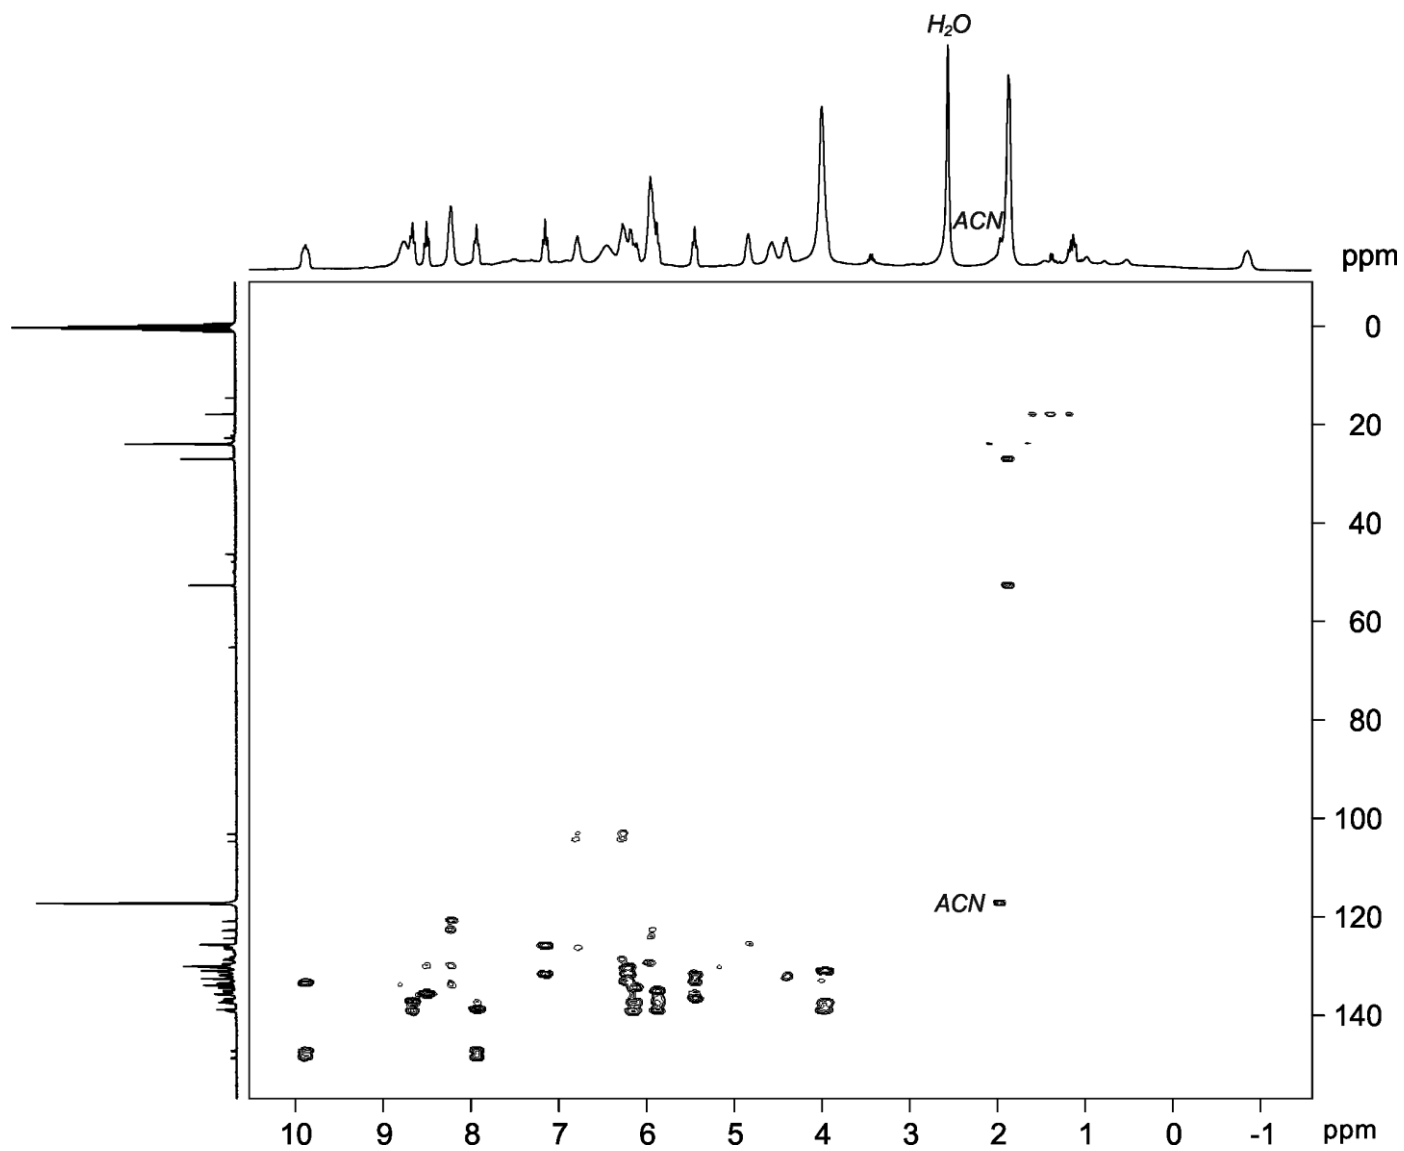

Figure S7.  $^1\text{H}$ ,  $^{13}\text{C}$  gHMBC NMR spectrum of **2** in  $\text{CD}_3\text{CN}$  at RT.

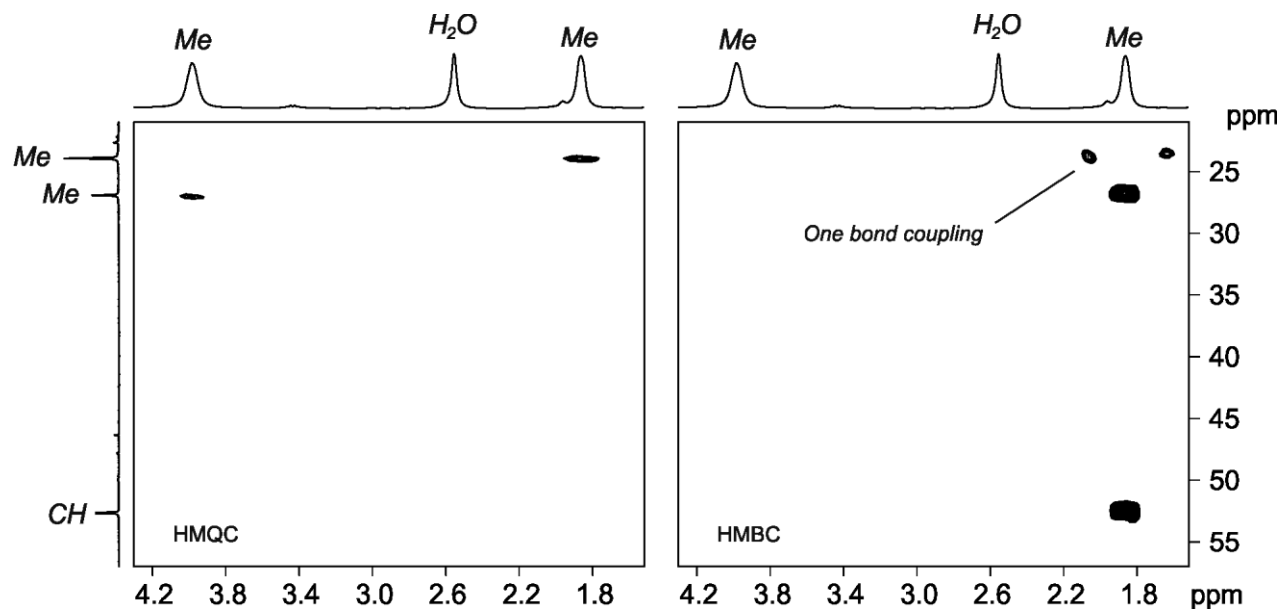

Figure S8. <sup>1</sup>H, <sup>13</sup>C gHMQC and gHMBC NMR expansions of the NiPr<sub>2</sub> region for complex **2** in CD<sub>3</sub>CN at RT.

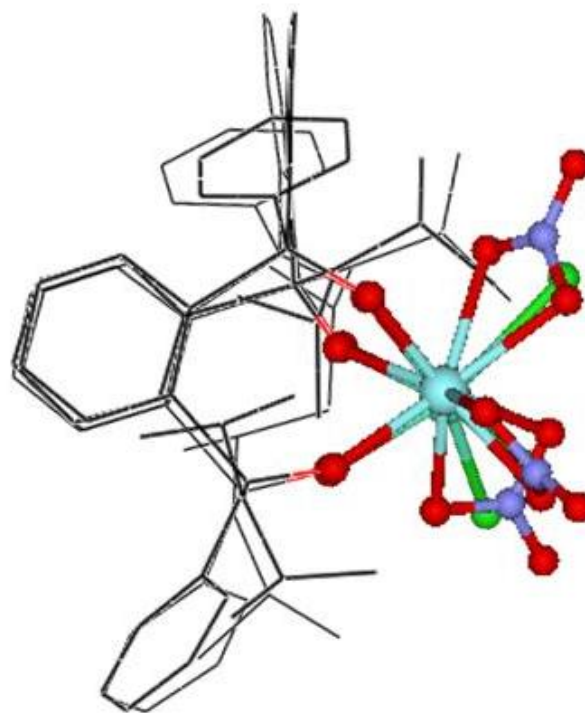

Figure S9. X-ray structures overlay for [Eu(1)Cl<sub>3</sub>] (**4**) and [Y(1)(NO<sub>3</sub>)<sub>3</sub>] (**5**). For complex **5** only one conformation out of the two existing in the asymmetric unit is shown.

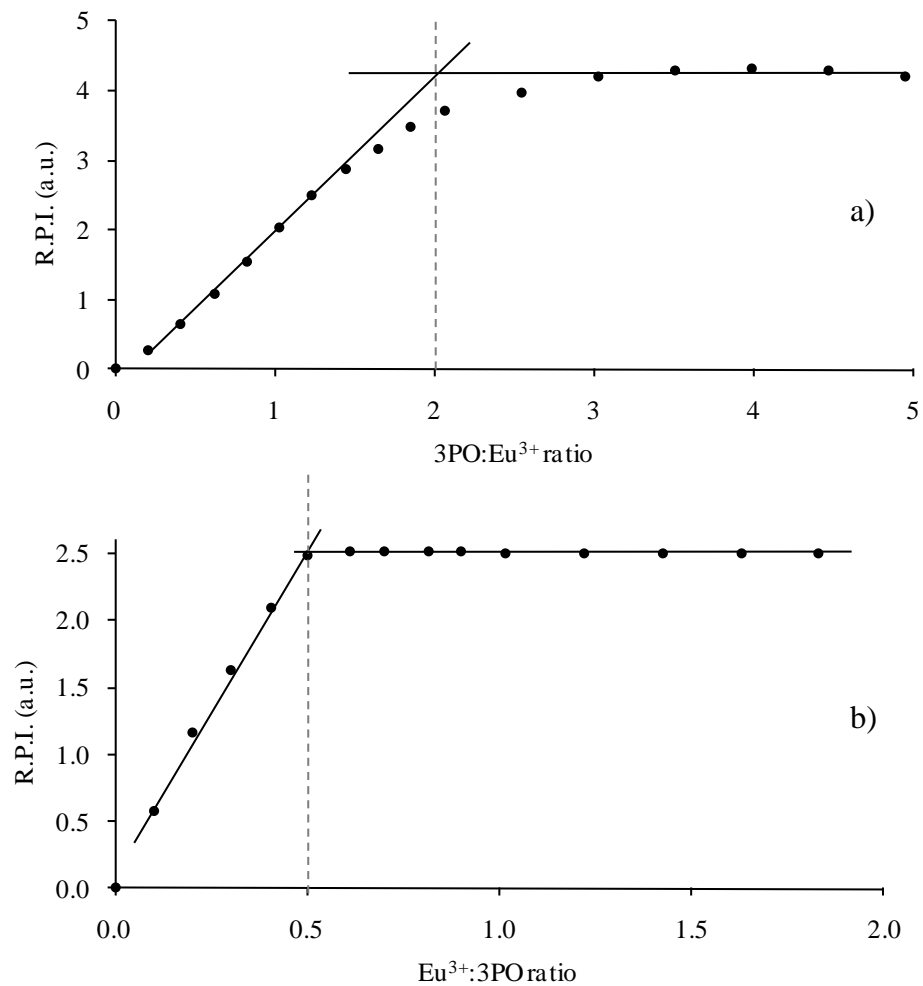

Figure S10. Response of the complex luminescence intensity versus a) Ligand:Eu<sup>3+</sup> ratio ([Eu<sup>3+</sup>]= 8.0 x 10<sup>-6</sup> M, 75% EtOH, v/v, [NaCl]= 31 mM and pH=7.0); and b) Eu<sup>3+</sup>:Ligand ratio ([Ligand]= 8.3 x 10<sup>-6</sup> M, 75% EtOH, v/v; [NaCl]= 31 mM and pH=7.0).

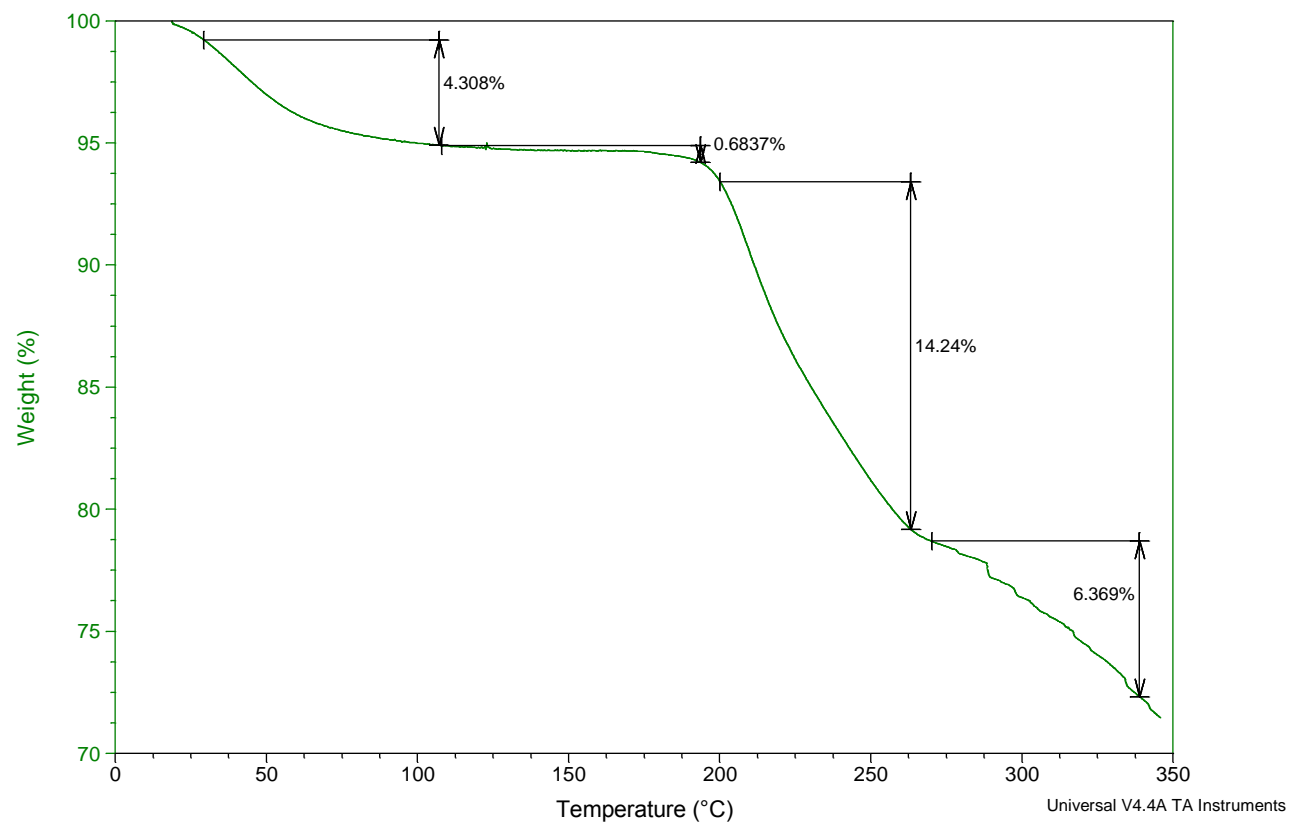

Figure S11. TGA spectrum for complex **2** at the heating rate of 10°C/min under nitrogen atmosphere.

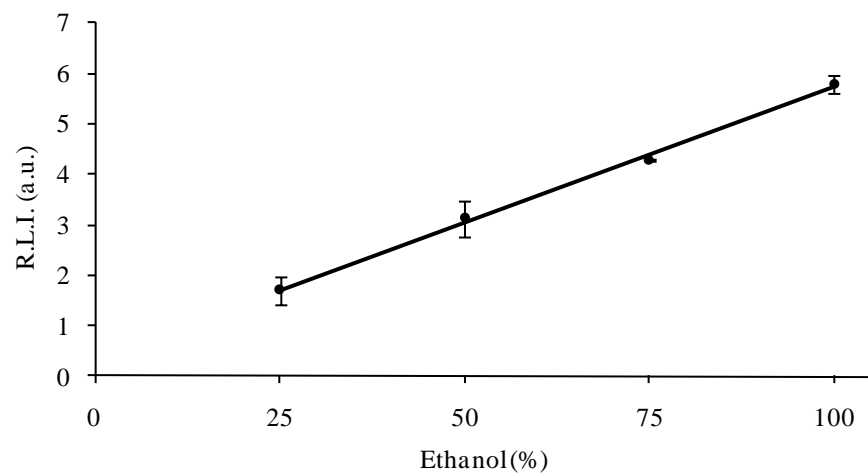

Figure S12. Luminescence intensity versus EtOH percentage in solution.  $[\text{Eu}^{3+}] = [\text{Ligand}] = 9.6 \times 10^{-5} \text{ M}$ .

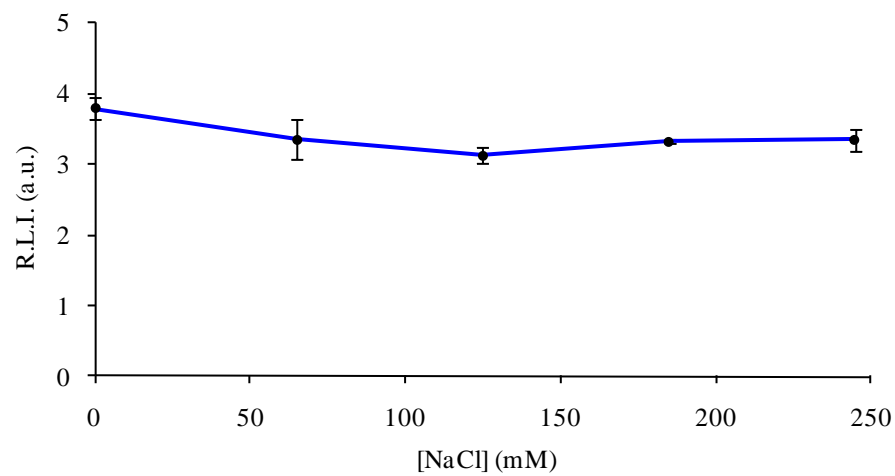

Figure S13. Influence of NaCl concentration on the luminescence intensity in solution.  $[\text{Eu}^{3+}] = [\text{Ligand}] = 9.6 \times 10^{-5} \text{ M}$  (75% EtOH, v/v).



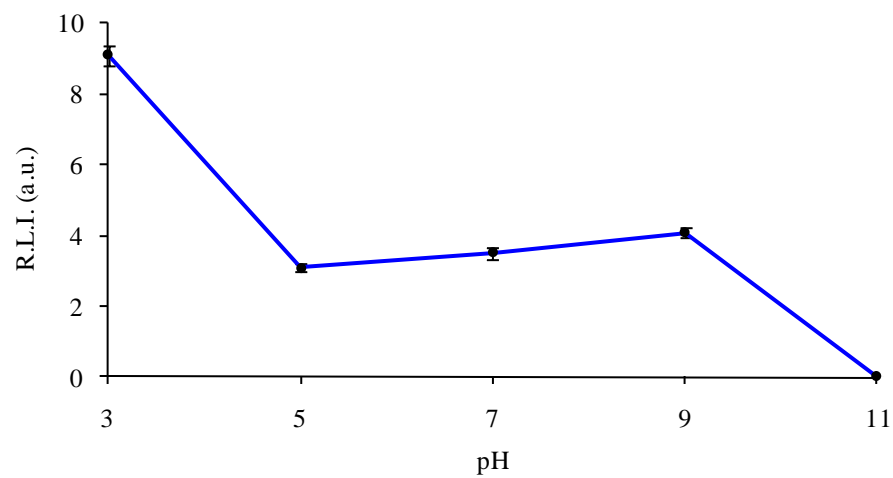

Figure S14. The pH effect on the complex luminescence intensity in solution.  $[\text{Eu}^{3+}] = [\text{Ligand}] = 9.6 \times 10^{-5} \text{ M}$  (75% EtOH, v/v;  $[\text{NaCl}] = 31 \text{ mM}$ ).

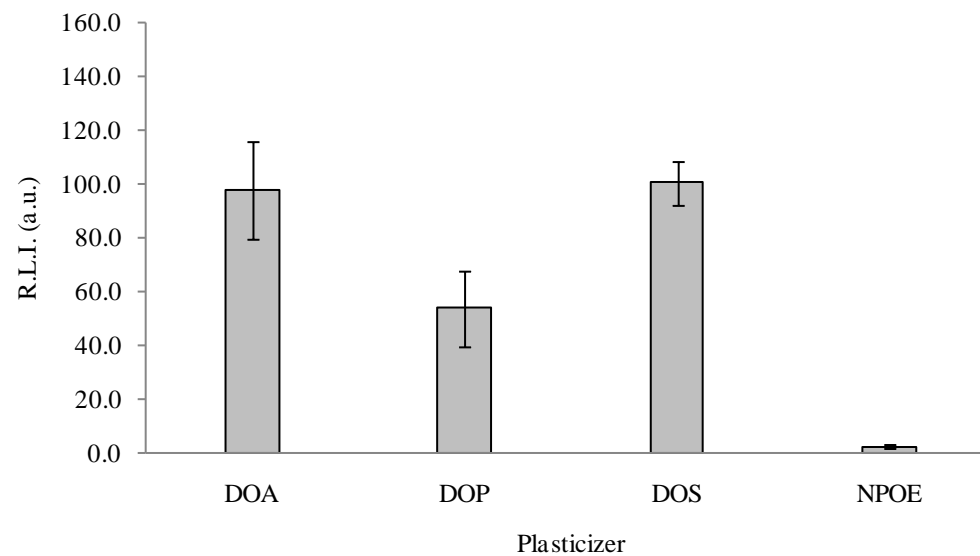

Figure S15. The plasticizer effect on the luminescence signals of the membrane sensors. *DOA* bis(2-ethylhexyl) adipate, *DOP* dioctyl phthalate, *DOS* bis(2-ethylhexyl) sebacate and *NPOE* 2-nitrophenyloctyl ether. Membrane composition: PVC:Plasticizer:Ligand:KTpCIPB as 32.8:64.7:1.5:1.0 (% w/w).  $[\text{Eu}^{3+}] = 1.0 \times 10^{-6}$  M in distilled water.

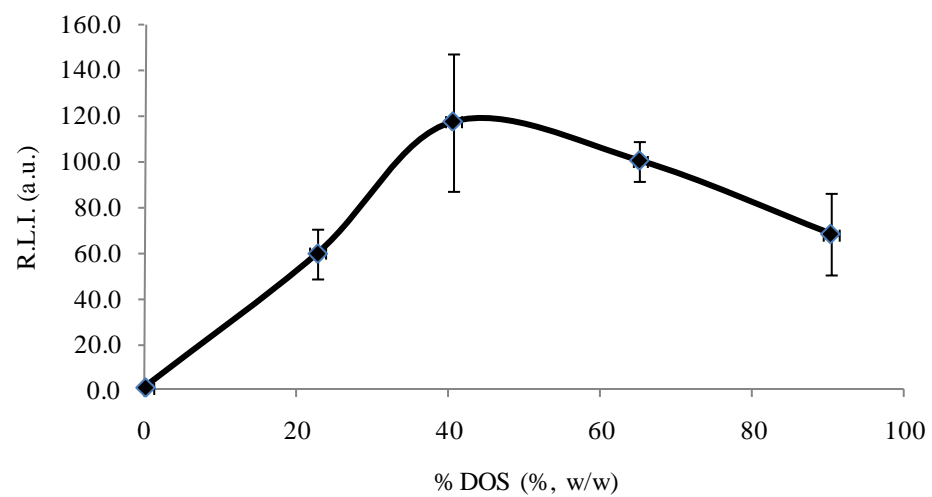

Figure S16. Luminescence intensities of the membrane sensors versus DOS plasticizer percentage. *DOS* bis(2-ethylhexyl) sebacate. Membrane composition: PVC:DOS:Ligand:KTpClPB as 7.5-97.5:0-90.0:1.5:1.0 (% w/w).  $[\text{Eu}^{3+}] = 1.0 \times 10^{-6}$  M in distilled water.

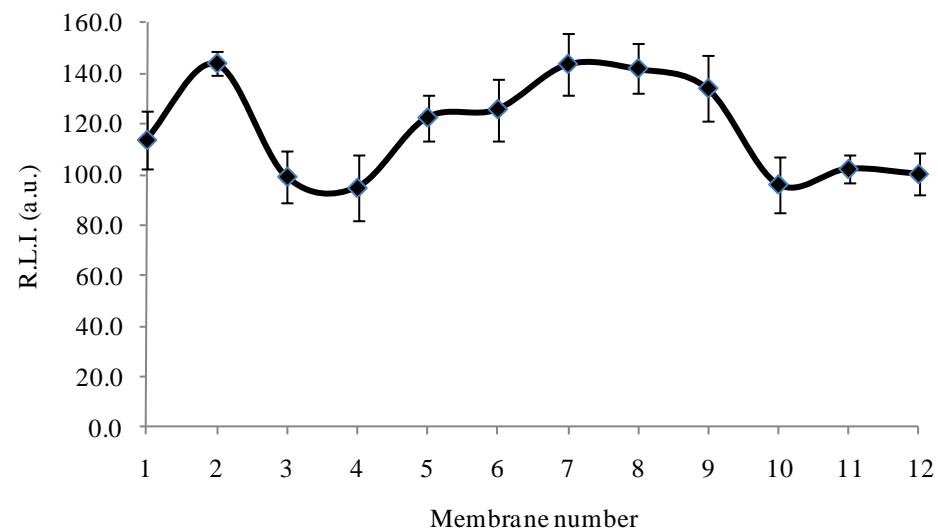

Figure S17. The joint effect of the ligand and ionic additive percentages on the luminescence responses of the membrane sensors. Membrane composition: PVC:DOS:Ligand:KTpCIPB as 27.9-33.4:65.1:1.5-3.5:0-3.5 (% , w/w).  $[\text{Eu}^{3+}] = 1.0 \times 10^{-6}$  M in distilled water. Table 2 shows the composition of each membrane.

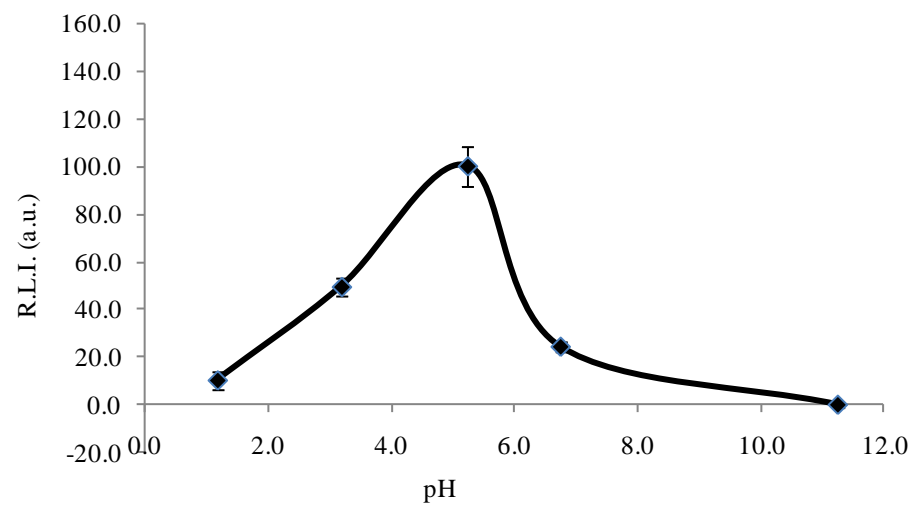

Figure S18. The pH effect on the luminescence signals of the europium sensors. Optimum membrane composition: PVC:DOS:Ligand:KTpCIPB as 33.4:65.1:1.5:0 (% , w/w).  $[\text{Eu}^{3+}] = 1.0 \times 10^{-6} \text{ M}$  in distilled water.

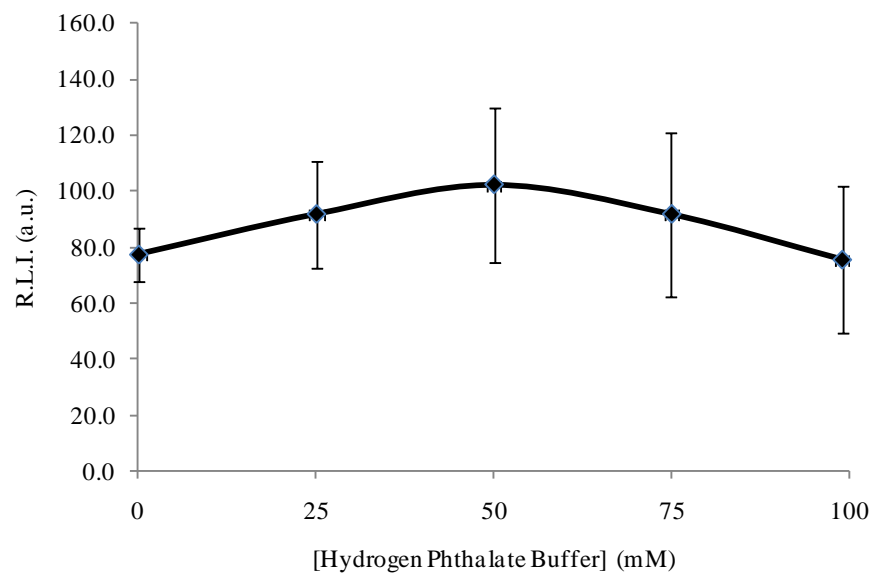

Figure S19. Effect of the ionic strength on the luminescence signals of the membrane sensors. Optimum membrane composition: PVC:DOS:Ligand:KTpCIPB as 33.4:65.1:1.5:0 (% , w/w).  $[\text{Eu}^{3+}] = 1.0 \times 10^{-6} \text{ M}$  in distilled water at pH 5.0 and in different hydrogen phthalate buffer concentration solutions at pH 5.0.

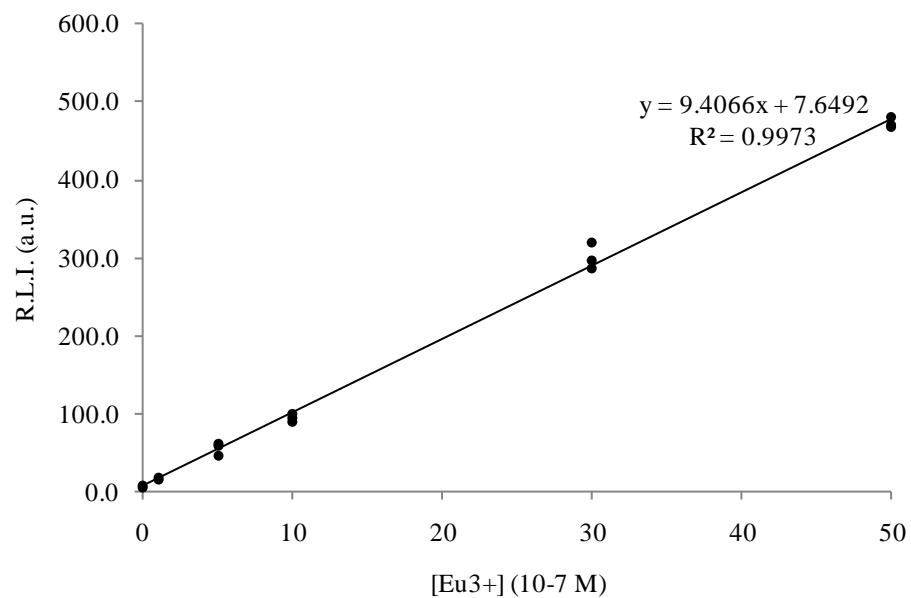

Figure S20. Calibration graph of europium(III) membrane sensors. Optimum membrane composition: PVC:DOS:Ligand:KTpCIPB as 33.4:65.1:1.5:0 (% , w/w). [Blank]= 25 mM hydrogen phthalate buffer at pH 5.0 and  $[Eu^{3+}] = 1.0 \times 10^{-7} - 5.0 \times 10^{-6}$  M in 25 mM hydrogen phthalate buffer solution at pH 5.0.

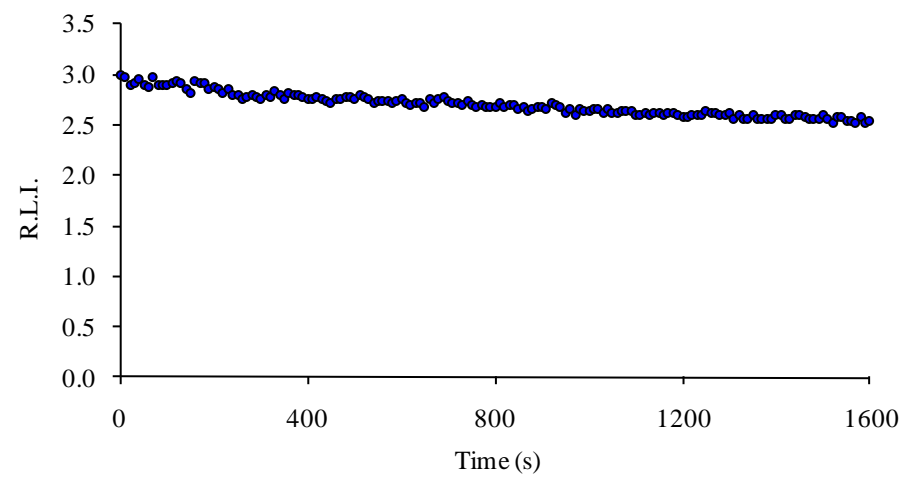

Figure S21. Variation of the luminescence emission in solution versus time.
